# Supplementary material for: Early B Cell and Plasma Cell Kinetics Upon Treatment Initiation Portend Flares in Systemic Lupus Erythematosus: A Post-Hoc Analysis of Three Phase III Clinical Trials of Belimumab
Source: PubMed Central journal article supplement (PMC9015703; doi:10.3389/fimmu.2022.796508), 2022-04-04
Supplement: Table_1.pdf [file Table_1.pdf]

**Supplementary Table S1.** Relative to baseline percentage change in B cell subset counts and serum levels of serological markers from baseline through week 8 in patients who developed versus did not develop flares from week 24 through week 52 in the pooled BLISS study population.

|                                                           | Any flare           |                     |                  | Severe flare        |                     |              |
|-----------------------------------------------------------|---------------------|---------------------|------------------|---------------------|---------------------|--------------|
|                                                           | Yes                 | No                  | P value          | Yes                 | No                  | P value      |
| <b>Entire patient cohort (all treatment arms)</b>         |                     |                     |                  |                     |                     |              |
| <b>B cell subsets</b>                                     |                     |                     |                  |                     |                     |              |
| CD19 <sup>+</sup> CD20 <sup>+</sup>                       | -4.1 (-30.2–36.7)   | 0.0 (-29.9–48.9)    | 0.211            | -5.6 (-30.2–45.1)   | -2.0 (-30.0–40.9)   | 0.969        |
| CD19 <sup>+</sup> CD20 <sup>+</sup> CD27 <sup>+</sup>     | 76.7 (0.0–188.9)    | 84.6 (6.1–200.0)    | 0.179            | 50.0 (-16.7–200.0)  | 83.5 (6.7–192.2)    | <b>0.037</b> |
| CD19 <sup>+</sup> CD20 <sup>+</sup> CD69 <sup>+</sup>     | -17.3 (-64.6–110.7) | -10.5 (-68.7–96.0)  | 0.561            | -11.5 (-61.2–134.9) | -16.2 (-66.7–105.7) | 0.378        |
| CD19 <sup>+</sup> CD20 <sup>+</sup> CD27 <sup>-</sup>     | -17.5 (-44.6–21.1)  | -15.5 (-44.3–17.9)  | 0.633            | -12.4 (-41.3–27.1)  | -17.0 (-44.6–17.9)  | 0.273        |
| CD19 <sup>+</sup> CD20 <sup>+</sup> CD138 <sup>+</sup>    | -20.6 (-67.8–80.0)  | -12.0 (-69.8–114.0) | 0.496            | -4.0 (-68.0–113.1)  | -18.6 (-68.3–97.1)  | 0.599        |
| CD19 <sup>+</sup> CD20 <sup>+</sup> CD138 <sup>+</sup>    | -19.5 (-65.4–56.0)  | -28.0 (-68.5–63.5)  | 0.194            | -11.9 (-58.7–81.1)  | -24.0 (-67.7–54.1)  | 0.123        |
| CD19 <sup>+</sup> CD20 <sup>+</sup> CD27 <sup>brt</sup>   | -30.6 (-66.7–33.3)  | -30.0 (-68.4–7.5)   | 0.240            | -21.8 (-62.8–93.8)  | -31.1 (-66.7–17.8)  | 0.105        |
| CD19 <sup>+</sup> CD27 <sup>brt</sup> CD38 <sup>brt</sup> | -22.8 (-62.5–58.1)  | -29.1 (-61.8–37.7)  | 0.354            | -24.8 (-62.9–58.5)  | -26.4 (-61.8–49.3)  | 0.967        |
| <b>Serological markers</b>                                |                     |                     |                  |                     |                     |              |
| C3                                                        | 2.0 (-9.0–14.5)     | 2.7 (-7.5–15.5)     | 0.247            | 0.5 (-8.5–14.6)     | 2.7 (-8.4–15.1)     | 0.662        |
| C4                                                        | 6.3 (-7.3–23.6)     | 8.3 (-5.9–28.6)     | 0.080            | 4.9 (-11.5–25.0)    | 7.1 (-6.3–25.0)     | 0.235        |
| anti-dsDNA (all patients)                                 | 0.0 (-27.3–0.2)     | -12.5 (-34.1–0.0)   | <b>&lt;0.001</b> | -4.7 (-27.1–1.8)    | -4.9 (-31.2–0.0)    | 0.339        |
| anti-dsDNA (patients positive at baseline)                | -15.8 (-36.5–8.1)   | -22.2 (-39.9–0.6)   | <b>0.001</b>     | -14.2 (-36.5–7.3)   | -19.1 (-38.6–3.8)   | 0.193        |
| <b>Belimumab</b>                                          |                     |                     |                  |                     |                     |              |
| <b>B cell subsets</b>                                     |                     |                     |                  |                     |                     |              |
| CD19 <sup>+</sup> CD20 <sup>+</sup>                       | -4.8 (-35.3–43.9)   | 0.0 (-31.6–60.0)    | 0.243            | -7.1 (-37.7–63.1)   | -2.1 (-32.3–50.6)   | 0.971        |
| CD19 <sup>+</sup> CD20 <sup>+</sup> CD27 <sup>+</sup>     | 128.6 (61.1–250.0)  | 126.3 (50.0–250.0)  | 0.548            | 114.3 (-38.9–281.7) | 128.6 (58.3–242.9)  | 0.620        |
| CD19 <sup>+</sup> CD20 <sup>+</sup> CD69 <sup>+</sup>     | -19.0 (-64.3–107.2) | -10.5 (-67.4–96.0)  | 0.874            | -10.8 (-63.6–136.7) | -17.9 (-66.5–100.8) | 0.447        |
| CD19 <sup>+</sup> CD20 <sup>+</sup> CD27 <sup>-</sup>     | -29.9 (-53.0–12.8)  | -25.3 (-49.6–14.2)  | 0.157            | -20.8 (-53.8–22.6)  | -28.3 (-51.3–13.1)  | 0.765        |
| CD19 <sup>+</sup> CD20 <sup>+</sup> CD138 <sup>+</sup>    | -19.2 (-67.4–80.2)  | -11.3 (-68.2–124.4) | 0.691            | -0.2 (-63.7–118.4)  | -16.6 (-68.1–100.0) | 0.296        |
| CD19 <sup>+</sup> CD20 <sup>+</sup> CD138 <sup>+</sup>    | -23.8 (-69.0–46.1)  | -33.3 (-71.3–63.6)  | 0.449            | -23.6 (-66.3–74.4)  | -28.9 (-70.8–50.8)  | 0.567        |
| CD19 <sup>+</sup> CD20 <sup>+</sup> CD27 <sup>brt</sup>   | -36.4 (-71.1–14.3)  | -40.0 (-75.0–0.0)   | 0.402            | -39.2 (-66.7–40.7)  | -37.5 (-72.7–0.0)   | 0.393        |
| CD19 <sup>+</sup> CD27 <sup>brt</sup> CD38 <sup>brt</sup> | -31.9 (-65.7–39.9)  | -37.0 (-65.4–22.8)  | 0.384            | -42.9 (-73.2–25.3)  | -33.7 (-65.1–34.3)  | 0.385        |
| <b>Serological markers</b>                                |                     |                     |                  |                     |                     |              |
| C3                                                        | 3.3 (-7.9–15.2)     | 5.1 (-6.4–18.7)     | 0.091            | 2.2 (-7.4–15.1)     | 3.8 (-6.8–16.4)     | 0.497        |
| C4                                                        | 9.1 (-3.6–28.2)     | 11.8 (-4.4–32.2)    | 0.264            | 9.1 (-3.3–30.8)     | 10.0 (-4.0–29.4)    | 0.838        |
| anti-dsDNA (all patients)                                 | -4.6 (-30.7–0.0)    | -17.7 (-37.8–0.0)   | <b>&lt;0.001</b> | -8.7 (-31.3–1.3)    | -12.3 (-34.5–0.0)   | 0.302        |
| anti-dsDNA (patients positive at baseline)                | -20.2 (-42.5–2.7)   | -27.4 (-43.2–6.3)   | <b>0.012</b>     | -16.5 (-43.9–5.9)   | -23.8 (-43.0–2.9)   | 0.165        |
| <b>Placebo</b>                                            |                     |                     |                  |                     |                     |              |
| <b>B cell subsets</b>                                     |                     |                     |                  |                     |                     |              |
| CD19 <sup>+</sup> CD20 <sup>+</sup>                       | -3.1 (-24.4–31.9)   | 0.0 (-25.9–26.5)    | 0.630            | -3.5 (-24.4–34.1)   | -2.0 (-24.9–27.8)   | 0.972        |
| CD19 <sup>+</sup> CD20 <sup>+</sup> CD27 <sup>+</sup>     | -2.1 (-34.7–33.3)   | 4.2 (-25.0–39.7)    | <b>0.037</b>     | -11.1 (-47.2–47.1)  | 0.0 (-28.6–35.7)    | 0.399        |
| CD19 <sup>+</sup> CD20 <sup>+</sup> CD69 <sup>+</sup>     | -14.8 (-64.8–127.3) | -12.6 (-69.9–96.6)  | 0.439            | -11.5 (-60.6–130.0) | -15.3 (-68.0–116.4) | 0.653        |
| CD19 <sup>+</sup> CD20 <sup>+</sup> CD27 <sup>-</sup>     | -2.5 (-24.0–32.7)   | -2.4 (-26.3–26.8)   | 0.924            | 0.0 (-25.0–33.3)    | -2.6 (-25.3–31.6)   | 0.761        |
| CD19 <sup>+</sup> CD20 <sup>+</sup> CD138 <sup>+</sup>    | -23.4 (-67.9–72.1)  | -13.6 (-72.2–110.3) | 0.562            | -9.3 (-73.4–88.6)   | -19.5 (-69.0–89.2)  | 0.755        |
| CD19 <sup>+</sup> CD20 <sup>+</sup> CD138 <sup>+</sup>    | -11.3 (-58.9–68.3)  | -12.4 (-62.6–63.6)  | 0.400            | 2.4 (-47.0–86.2)    | -14.2 (-62.1–64.9)  | 0.144        |
| CD19 <sup>+</sup> CD20 <sup>+</sup> CD27 <sup>brt</sup>   | -14.4 (-53.2–66.7)  | 0.0 (-50.0–51.6)    | 0.967            | -2.7 (-54.0–115.4)  | -7.6 (-50.0–51.1)   | 0.272        |
| CD19 <sup>+</sup> CD27 <sup>brt</sup> CD38 <sup>brt</sup> | -2.9 (-54.1–86.1)   | -0.9 (-48.3–73.8)   | 0.681            | -5.4 (-50.9–93.3)   | -1.4 (-51.3–77.1)   | 0.830        |
| <b>Serological markers</b>                                |                     |                     |                  |                     |                     |              |
| C3                                                        | 0.0 (-10.2–13.1)    | -0.9 (-10.0–7.9)    | 0.451            | 0.0 (-8.9–12.8)     | -0.7 (-10.2–10.1)   | 0.591        |
| C4                                                        | 0.0 (-14.3–16.7)    | 3.3 (-10.0–15.4)    | 0.413            | 0.0 (-15.8–16.7)    | 0.0 (-12.5–16.7)    | 0.434        |
| anti-dsDNA (all patients)                                 | 0.0 (-21.5–9.2)     | 0.0 (-23.6–12.6)    | 0.750            | 0.0 (-24.7–9.8)     | 0.0 (-21.6–10.8)    | 0.569        |
| anti-dsDNA (patients positive at baseline)                | -4.0 (-28.2–17.9)   | -9.4 (-29.6–15.1)   | 0.439            | -8.7 (-29.8–15.2)   | -4.4 (-28.2–17.6)   | 0.544        |

Data are presented as medians (interquartile range) of the relative to baseline percentage changes. P values are derived from non-parametrical Mann-Whitney U tests. Statistically significant P values are in bold.

C3: complement component 3; C4: complement component 4
